# Supplementary material for: High performance of PbSe/PbS core/shell quantum dot heterojunction solar cells: short circuit current enhancement without the loss of open circuit voltage by shell thickness control
Source: Royal Society of Chemistry journal article supplement (doi:10.1039/c5nr03309h), 2015-01-01
Supplement: c5nr03309h1.pdf [file c5nr03309h1.pdf]

Supporting Information

High performance of PbSe/PbS core/shell  
quantum dot heterojunction solar cells: Short  
circuit current enhancement without loss of open  
circuit voltage by shell thickness control

Hyekyoung Choi,<sup>a,b</sup> Jung Hoon Song,<sup>a,d</sup> Jihoon Jang,<sup>a</sup> Xuan Dung Mai,<sup>a,c</sup>

Sungwoo Kim<sup>a</sup>, and Sohee Jeong<sup>a,b\*</sup>

---

<sup>a.</sup> *Nano-Mechanical Systems Research Division, Korea institute of Machinery and Materials (KIMM), Daejeon, 305-343, Republic of Korea.*

<sup>b.</sup> *Korea University of Science and Technology (UST), Daejeon 305-350, Republic of Korea.*

<sup>c.</sup> *Department of Chemistry, Hanoi pedagogical university No 2, Vinh Phuc, Vietnam.*

<sup>d.</sup> *Graduate School of Nanoscience and Technology, Korea Advanced Institute of Science and Technology, Daejeon, 306-701, Republic of Korea.*

\*Address correspondence to

[sjeong@kimm.re.kr](mailto:sjeong@kimm.re.kr)

**Scheme S1.** Synthesis scheme for PbSe/PbS core/shell CQDs of (a) conventional method, (b) our methods.

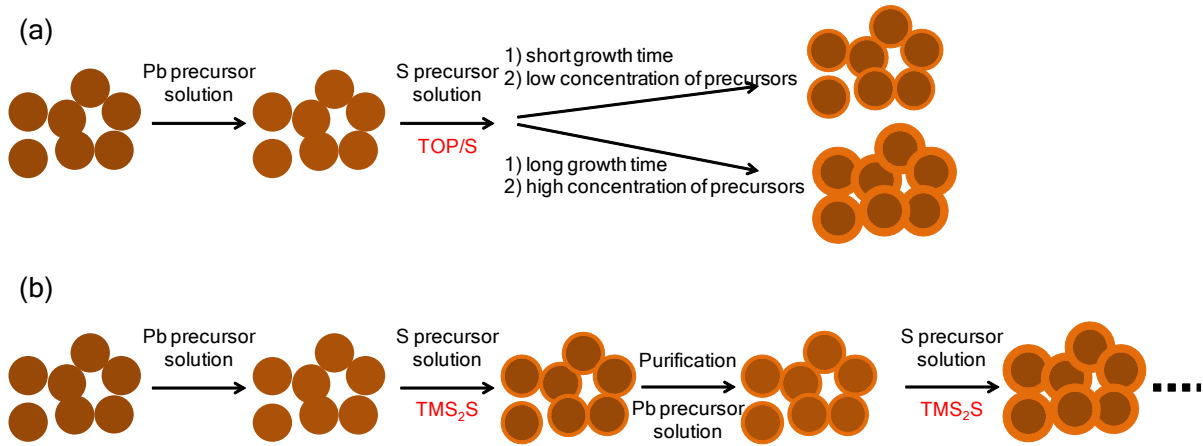

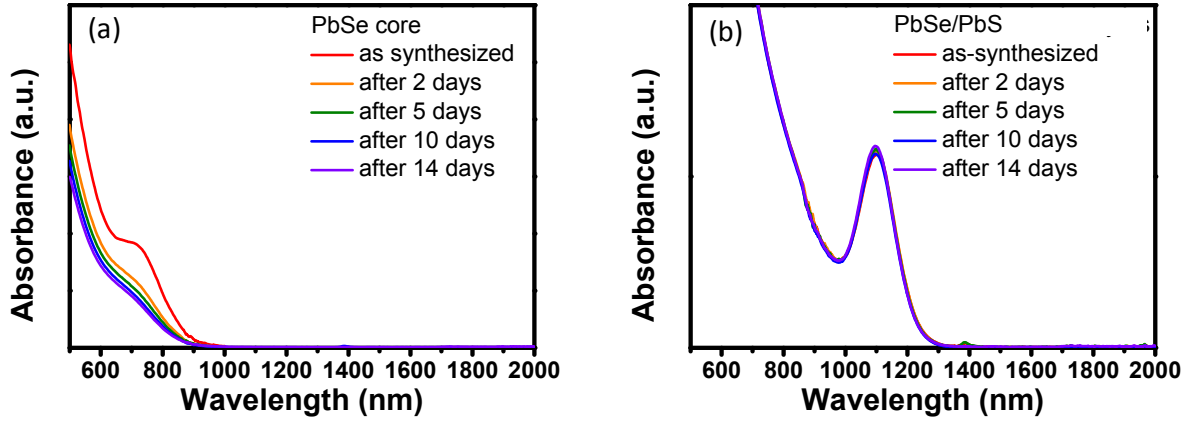

**Figure S1.** Absorption spectra of PbSe core and PbSe/PbS core/shell with 1.3-nm-thick PbS shell depending on elapsed time.

**Table S1.** Performance parameters of PbSe/PbS core/shell CQD solar cells depending on PbS shell thickness under AM 1.5G illumination. Results are averaged with standard deviation across over 12 cells.

|                  | $V_{oc}$ (V) | $J_{sc}$ (mA/cm <sup>2</sup> ) | FF (%) | $\eta$ (%) |
|------------------|--------------|--------------------------------|--------|------------|
| Core             | 0.46±0.02    | 6.4±0.43                       | 30±0.4 | 0.9±0.8    |
| 0.5 nm PbS shell | 0.46±0.01    | 9.3±0.03                       | 40±1.2 | 1.7±0.06   |
| 0.9 nm PbS shell | 0.46±0.01    | 11.8±0.8                       | 49±3.8 | 3.0±0.43   |
| 1.3 nm PbS shell | 0.43±0.01    | 12.3±1.2                       | 37±1.2 | 1.5±0.20   |

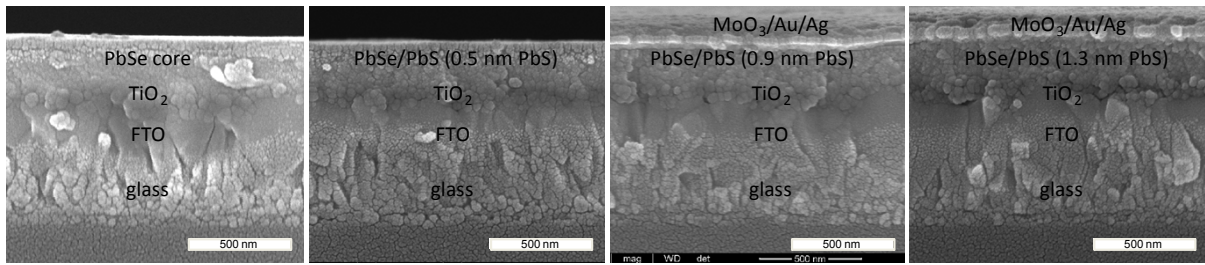

**Figure S2.** Cross-sectional SEM images of PbSe/PbS core/shell with 0 to 1.3 nm PbS shell thickness. The scale bar represents 500 nm.

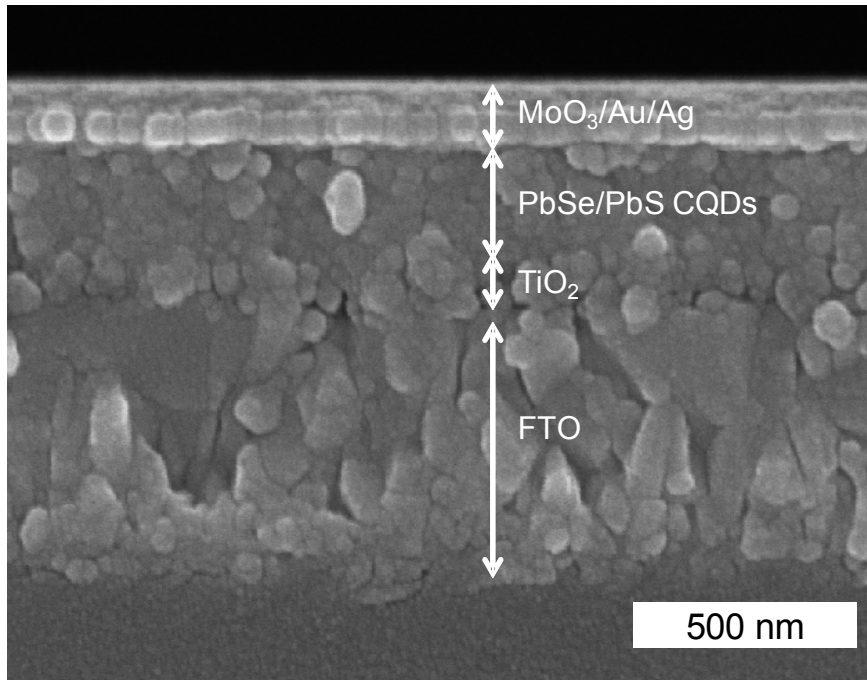

**Figure S3.** Cross-sectional SEM images of PbSe/PbS core/shell with 0.9-nm-thick PbS shell after further optimization. The scale bar represents 500 nm.

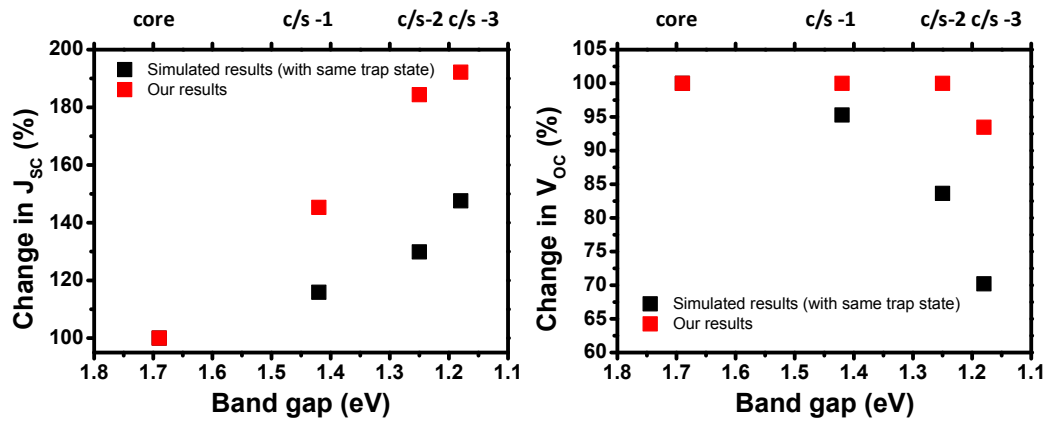

**Figure S4.** Simulated and experimented changes in the  $J_{sc}$  and  $V_{oc}$  in solar cell as a function of CQD band gap.

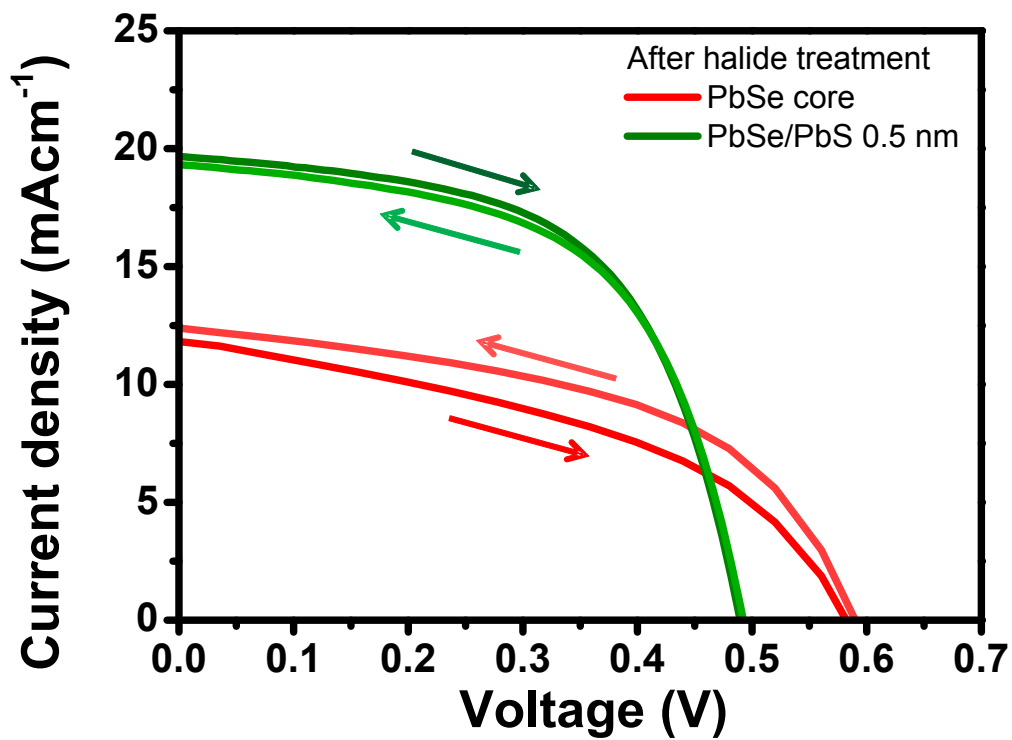

Figure S5. j-v curves of solar cells with PbSe core and PbSe/PbS core/shell-0.5nm after halide treatment.



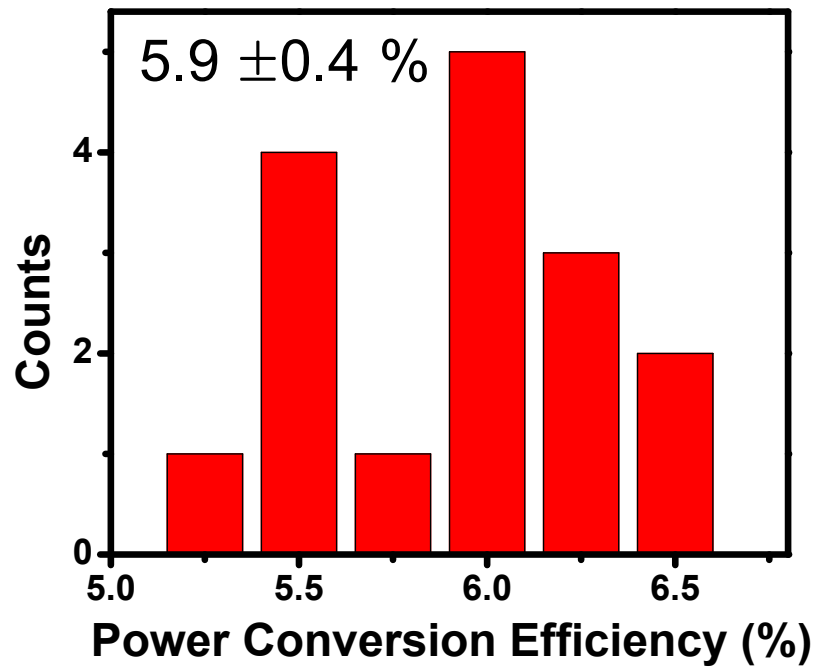

**Figure S6.** Histogram of power conversion efficiencies for 16 separate devices under AM 1.5G illumination conditions of the PbSe/PbS core/shell CQD heterojunction solar cells with 0.9-nm-thick PbS shell.
